# Supplementary material for: Nanocrystallized Oleanolic Acid Better Inhibits Proliferation, Migration and Invasion in Intracranial Glioma via Caspase-3 Pathway
Source: PubMed Central journal article supplement (PMC7052863; doi:10.7150/jca.38847), 2020-01-29
Supplement: jcav11p1949s1.pdf [file jcav11p1949s1.pdf]

## Supplementary Figures

**A**

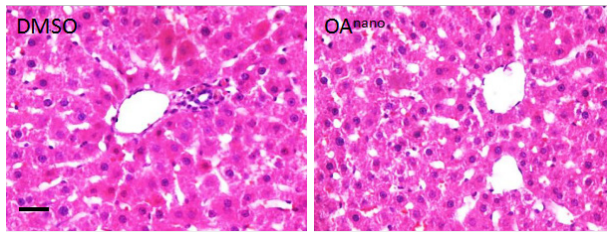

**B**

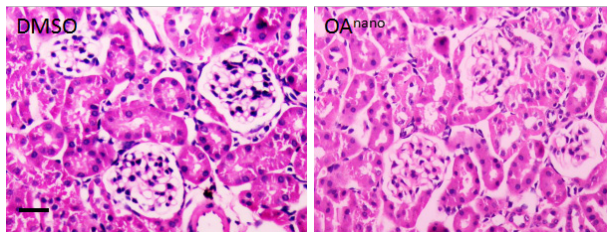

**C**

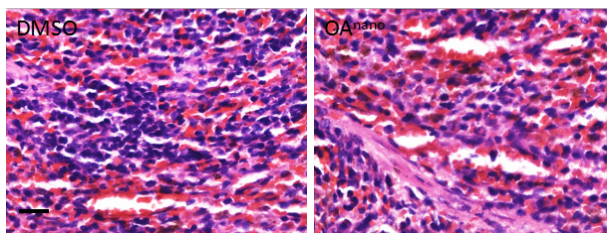

Supplementary figures OA<sup>nano</sup> treatment did not elicit overt cellular and tissue destruction in the liver, kidney and spleen

A: H&E staining of liver obtained from nude mice after treatment by OA<sup>nano</sup> and DMSO for 3 weeks.

B: H&E staining of kidney obtained from nude mice after treatment by OA<sup>nano</sup> and DMSO for 3 weeks.

C: H&E staining of spleen obtained from nude mice after treatment by OA<sup>nano</sup> and DMSO for 3 weeks.
